# Supplementary material for: What Happens in Male Dogs after Treatment with a 4.7 mg Deslorelin Implant? II. Recovery of Testicular Function after Implant Removal
Source: MDPI journal article supplement (doi:10.3390/ani12192545), 2022-09-23
Supplement: s1 [file s1]

**Table S1.** Results of semen analysis of TG (n=5) during restart of spermatogenesis following implant removal; results are given as median (Q1, Q3).

| Time (days) | VOL (mL)        | % PM        | % VS              | % MAS             | TSC (x10 <sup>6</sup> ) |
|-------------|-----------------|-------------|-------------------|-------------------|-------------------------|
| 49          | 0.2 (0.1, 2.4)  | *           | *                 | *                 | *                       |
| 56          | 5.4 (0.3, 6.0)  | *           | *                 | *                 | *                       |
| 63          | 2.0 (1.3, 4.9)  | *           | *                 | *                 | *                       |
| 70          | 9.0 (3.9, 10.7) | *           | *                 | *                 | *                       |
| 77          | 6.6 (5.8, 10.3) | *           | *                 | *                 | *                       |
| 84          | 6.0 (5.5, 6.6)  | 80 (75, 80) | 92.0 (88.5, 94.0) | *                 | 409.7 (36.3, 515.6)     |
| 91          | 6.7 (5.4, 7.3)  | 85 (80, 85) | 91.5 (90.5, 92.5) | 22.0 (18.0, 52.0) | 350.0 (68.9, 360.0)     |
| 98          | 4.9 (3.1, 9.6)  | 80 (75, 80) | 90.5 (89.5, 91.0) | 25.0 (18.0, 39.5) | 265.7 (240.7, 330.0)    |
| 105         | 6.4 (3.5, 7.0)  | 75 (75, 80) | 89.5 (89.0, 92.5) | 22.0 (21.5, 32.5) | 190.5 (160.0, 370.3)    |
| 112         | 8.4 (8.2, 10.0) | 80 (75, 85) | 89.5 (88.5, 92.0) | 24.0 (13.5, 26.5) | 567.2 (484.0, 910.0)    |
| 119         | 6.6 (5.6, 9.1)  | 80 (75, 85) | 96.0 (95.0, 96.0) | 15.0 (10.5, 17.0) | 525.0 (342.7, 532.8)    |
| 126         | 8.8 (7.8, 10.1) | 85 (80, 85) | 94.0 (92.0, 95.5) | 12.5 (8.0, 14.0)  | 465.3 (307.0, 590.6)    |
| 133         | 7.8 (7.0, 10.4) | 85 (80, 85) | 93.0 (91.5, 96.0) | 15.5 (10.5, 17.0) | 654.6 (526.6, 684.1)    |
| 140         | 9.7 (7.5, 11.3) | 85 (80, 85) | 94.5 (93.0, 95.5) | 14.5 (14.0, 17.0) | 412.5 (411.7, 819.5)    |
| 147         | 8.7 (7.0, 10.3) | 80 (75, 85) | 93.5 (91.0, 95.0) | 9.5 (8.5, 17.5)   | 365.2 (344.5, 502.0)    |

\* analysis not possible in all dogs due to low ejaculate volume (sperm rich fraction).
